# Supplementary material
Source: PubMed Central journal article supplement (PMC5075051)
Supplement: AAC.00974-16_zac011165624so1.pdf [file AAC.00974-16_zac011165624so1.pdf]

Fig. S1

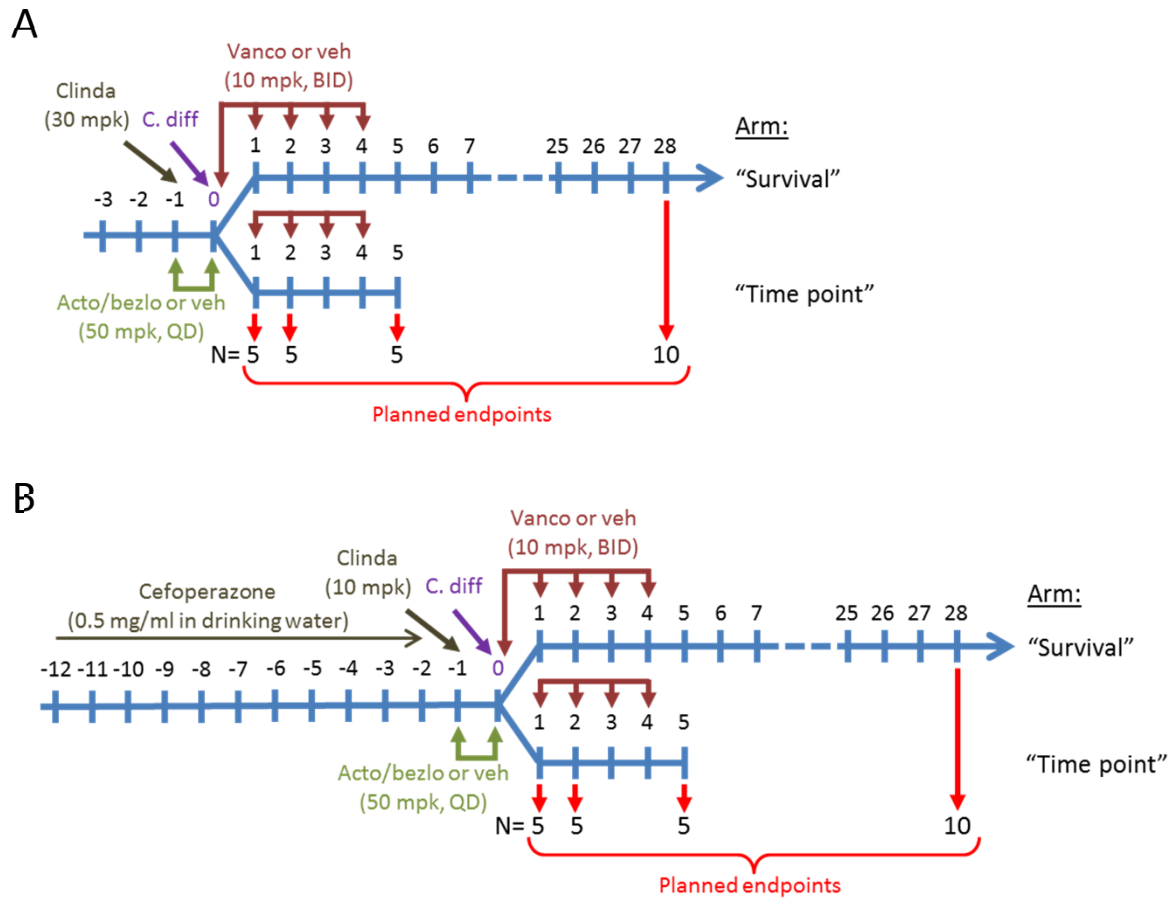

Fig. S1 Schematic representations of timelines for rodent CDI models used in this study. A) Hamster model. B) Mouse model. Times of administration of cefoperazone, clindamycin (“Clinda”), vancomycin (“Vanco”), actoxumab/bezlotoxumab (“Acto/bezlo”) or vehicle (“veh”), and of *C. difficile* challenge (“C diff”), are indicated. Numbers of animals intended to be euthanized (“N”) are as indicated at Days 1, 2, 5 and 28. Actual numbers euthanized were affected by animal survival. “mpk” = milligrams per kilogram; “QD” = “quaque die” (once daily); “BID” = “bis in die” (twice a day)

Fig. S2

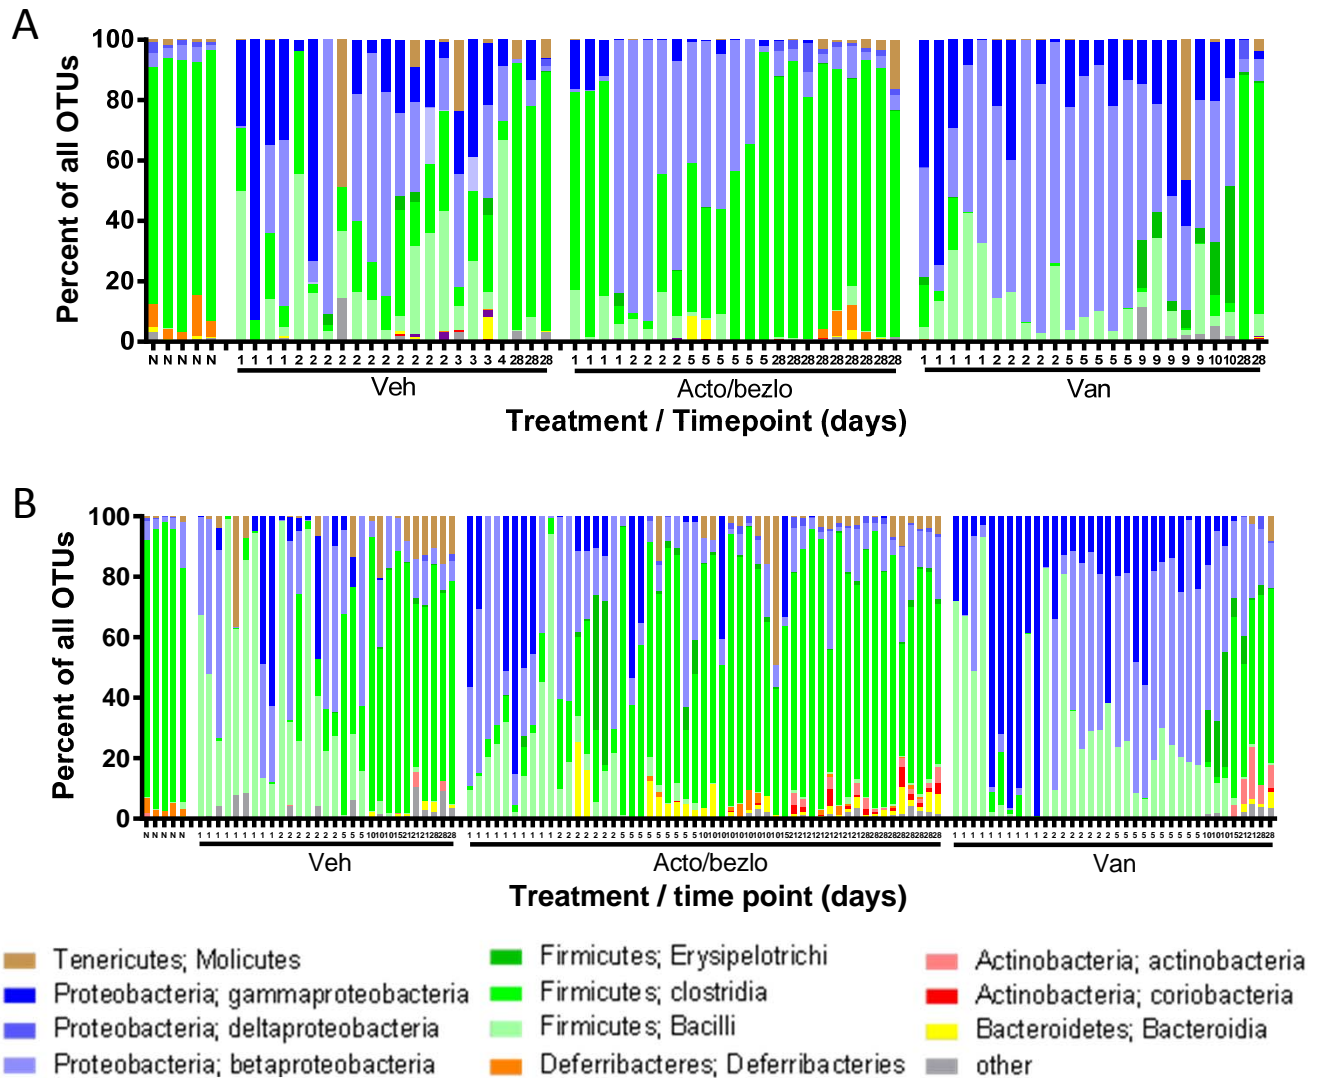

Fig. S2 *Effect of actoxumab/bezlotoxumab or vancomycin on microbiota composition of cecum content and feces in infected mice.* A) Relative microbiota composition (phylum and class, as indicated in legend) of cecum content samples from individual infected mice treated with vehicle (Veh), actoxumab/bezlotoxumab (Acto/bezlo) or vancomycin (Van), as indicated, at predefined time points (Days 1, 2, 5 and 28) or at time of death for animals that did not survive to predefined time points. Averages of animals within the same treatment group at the same timepoint are shown in Fig. 4C. B) As per panel A), but for fecal samples. Predefined time points were Days 1, 2, 5, 10, 15, 21 and 28 (“Survival” arm). Averages of animals within the same treatment group at the same timepoint are shown in Fig. 4F. “N” = naive.

Fig. S3

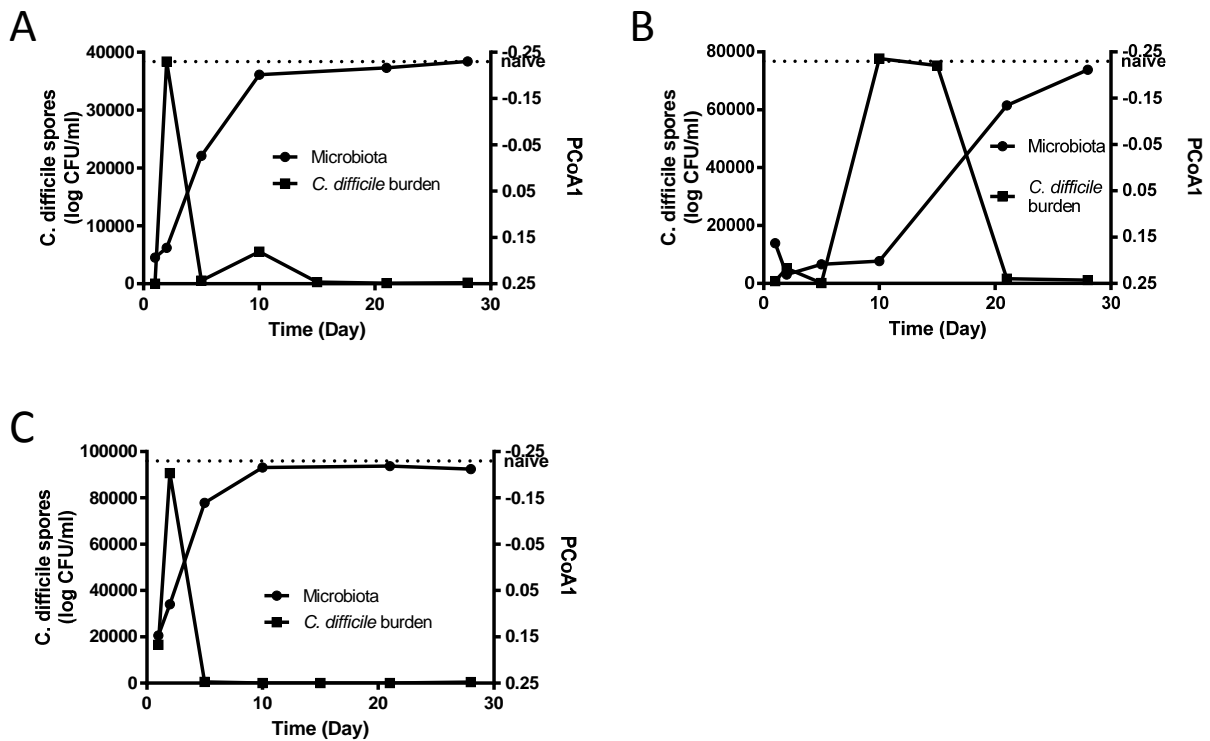

Fig. S3 *Inverse relationship between C. difficile burden and gut microbiota composition in fecal samples from infected mice.* A) *C. difficile* levels (CFU/mL) and microbiota composition (PCoA1) in fecal samples of vehicle-treated mice at predefined time points (Days 1, 2, 5, 10, 15, 21, 28; “Survival” arm). *C. difficile* levels are averages of individual data points shown in Fig. 3E, with data averaged and displayed in linear scale rather than log scale. PCoA1 values are taken from Fig. 4E, with Day 15 values omitted because a single animal was analyzed per group at that time point. B) As per A), but for vancomycin-treated animals. C) As per A), but for actoxumab/bezlotoxumab-treated animals.

Table S1 – Scoring system for gross intestinal score

| <u>Scoring Scheme Table:</u> | <u>Score</u> | <u>Additional Comments</u>                                                                                                                                                    |
|------------------------------|--------------|-------------------------------------------------------------------------------------------------------------------------------------------------------------------------------|
| Normal                       | 0            | No difference from wild type                                                                                                                                                  |
| Normal - loose content       | 0.5          | No difference from wild type but lacking formed faeces in the lower 1/3 of the colon                                                                                          |
| Normal - empty               | 1            | No difference from wild type but a total lack of contents, colon is flat                                                                                                      |
| Slightly inflamed            | 1.5          | Sections of the GI tract are enlarged compared to wild type                                                                                                                   |
| Slightly inflamed & empty    | 2            | Multiple sections of the GI tract are enlarged compared to wild type. No faecal content                                                                                       |
| Inflamed                     | 2.5          | Multiple sections of the GI tract are enlarged compared to wild type or smaller sections are grossly enlarged                                                                 |
| Inflamed & Red               | 3            | Multiple sections of the GI tract are enlarged compared to wild type or smaller sections are grossly enlarged. Redness and haemorrhages on the outer surface of the GI tract. |
| Enlarged                     | 4            | Large sections of the GI tract are grossly enlarged compared to wild type                                                                                                     |
| Inflamed & Enlarged          | 5            | Mega colon or mega ileum with redness and haemorrhages                                                                                                                        |

Table S2 – *C. difficile* burdens (log CFU/ml) in content of intestinal segments in individual mice and hamsters (data used to generate averages in Fig. 3A and B)

| Hamsters   |                   |                 |       |       | Mouse      |                   |                 |       |       |
|------------|-------------------|-----------------|-------|-------|------------|-------------------|-----------------|-------|-------|
| Treatment  | Timepoint (hours) | Small Intestine | Cecum | Colon | Treatment  | Timepoint (hours) | Small Intestine | Cecum | Colon |
| Acto/bezlo | 21                | <1.23           | <1.23 | <1.23 | Acto/bezlo | 20.5              | <1.23           | <1.23 | 2.92  |
|            | 21                | <1.23           | <1.23 | <1.23 |            | 20.5              | <1.23           | <1.23 | <1.23 |
|            | 21                | <1.23           | <1.23 | <1.23 |            | 20.5              | <1.23           | <1.23 | <1.23 |
|            | 21                | <1.23           | <1.23 | <1.23 |            | 21.75             | 2.45            | 5.3   | 4.54  |
|            | 21                | <1.23           | <1.23 | <1.23 |            | 22                | 2.34            | 6.22  | 4.07  |
|            | 43                | 2.44            | 3.82  | 3.64  |            | 44                | <1.23           | 3.87  | 2.52  |
|            | 43                | 3.25            | 3.5   | 4.07  |            | 44                | <1.23           | 4.79  | 3.07  |
|            | 43                | 2.7             | 3.99  | 4.78  |            | 44.5              | 4.62            | 4.68  | <1.23 |
|            | 43                | <1.23           | 3.99  | 5.03  |            | 44.5              | 2.45            | 4.07  | 3.71  |
|            | 43                | 3.58            | 3.6   | 5.22  |            | 113.75            | 3.7             | 5     | 3.88  |
|            | 114               | <1.23           | 2.99  | 2.96  |            | 113.75            | <1.23           | <1.23 | <1.23 |
|            | 114               | <1.23           | 3.05  | 3.58  |            | 114.5             | 3.19            | 4.3   | 3.4   |
|            | 114               | <1.23           | 2.91  | 3.1   |            | 114.5             | 2.7             | 5.5   | 2.81  |
|            | 114               | <1.23           | 4.79  | 3.56  |            | 114.75            | <1.23           | 2.6   | <1.23 |
|            | 114               | <1.23           | 2.93  | 4.67  |            | 147.35            | <1.23           | 3.98  | 2.3   |
|            | 138               | 1.92            | 3.58  | 2.75  |            | 667               | <1.23           | <1.23 | <1.23 |
|            | 138               | 1.52            | 3     | <1.23 |            | 667               | <1.23           | <1.23 | <1.23 |
|            | 138               | <1.23           | <1.23 | 2.97  |            | 667               | <1.23           | <1.23 | <1.23 |
|            | 138               | <1.23           | 3.82  | 3.12  |            | 667               | <1.23           | <1.23 | <1.23 |
|            | 138               | <1.23           | 3.92  | 3.48  |            | 667               | <1.23           | <1.23 | <1.23 |
| 259        | 2.07              | 3.43            | 2.93  | 667   | <1.23      | <1.23             | <1.23           |       |       |
| 666        | <1.23             | <1.23           | <1.23 | 667   | <1.23      | <1.23             | <1.23           |       |       |
| 666        | <1.23             | <1.23           | <1.23 | 667   | <1.23      | <1.23             | <1.23           |       |       |
| 666        | <1.23             | <1.23           | <1.23 | 667   | <1.23      | <1.23             | <1.23           |       |       |
| 666        | <1.23             | <1.23           | <1.23 | 667   | <1.23      | <1.23             | <1.23           |       |       |
| 666        | <1.23             | <1.23           | <1.23 | 667   | <1.23      | 3.34              | 2.86            |       |       |
| Vancomycin | 22                | <1.23           | <1.23 | <1.23 | 20.45      | 5.34              | 4.56            | 3.07  |       |
|            | 22                | <1.23           | <1.23 | <1.23 | 20.45      | <1.23             | 4.5             | <1.23 |       |
|            | 22                | <1.23           | <1.23 | <1.23 | 21         | 4.12              | 5.07            | 4.43  |       |
|            | 22                | <1.23           | <1.23 | <1.23 | 22.25      | <1.23             | <1.23           | <1.23 |       |
|            | 22                | <1.23           | <1.23 | <1.23 | 22.25      | <1.23             | <1.23           | <1.23 |       |
|            | 43                | <1.23           | <1.23 | <1.23 | 43         | 1.83              | 1.52            | <1.23 |       |
|            | 43                | <1.23           | <1.23 | <1.23 | 43         | <1.23             | 2.12            | <1.23 |       |
|            | 44                | <1.23           | <1.23 | <1.23 | 43         | <1.23             | <1.23           | <1.23 |       |
|            | 44                | <1.23           | <1.23 | <1.23 | 43         | <1.23             | <1.23           | <1.23 |       |
|            | 44                | <1.23           | <1.23 | <1.23 | 43         | <1.23             | <1.23           | <1.23 |       |
|            | 115               | <1.23           | <1.23 | <1.23 | 114        | <1.23             | <1.23           | <1.23 |       |
|            | 115               | <1.23           | <1.23 | <1.23 | 114        | <1.23             | 2               | <1.23 |       |
|            | 115               | <1.23           | <1.23 | <1.23 | 114.75     | <1.23             | <1.23           | <1.23 |       |
|            | 115               | <1.23           | <1.23 | <1.23 | 115        | <1.23             | <1.23           | <1.23 |       |
|            | 115               | <1.23           | <1.23 | <1.23 | 115        | <1.23             | <1.23           | <1.23 |       |
|            | 238               | 2.99            | 4.83  | 4.7   | 219        | <1.23             | 2.71            | <1.23 |       |
|            | 274               | 3.1             | 3.1   | 4.9   | 215.2      | <1.23             | <1.23           | <1.23 |       |
|            | 260               | <1.23           | <1.23 | 3.99  | 219        | <1.23             | 3               | <1.23 |       |
|            | 259               | <1.23           | <1.23 | 3.64  | 225.25     | <1.23             | 4               | 1.52  |       |
|            | 281               | 2               | 2.48  | 3.45  | 222.5      | <1.23             | <1.23           | <1.23 |       |
| 318        | 1.7               | 2.18            | 3.48  | 220   | 2.52       | 4.8               | 2.86            |       |       |
| 298        | 2.81              | 2.07            | <1.23 | 233.5 | <1.23      | 3.6               | <1.23           |       |       |
| 308        | 4.45              | 2.18            | 3.3   | 231.8 | 2.89       | 2.65              | <1.23           |       |       |
| 308        | 1.92              | 3.07            | 3.3   | 667   | <1.23      | <1.23             | <1.23           |       |       |
| 322        | 3.48              | 3.37            | 3.4   | 667   | <1.23      | <1.23             | <1.23           |       |       |
| Vehicle    | 24                | <1.23           | <1.23 | <1.23 | 20         | <1.23             | <1.23           | <1.23 |       |
|            | 21                | <1.23           | <1.23 | <1.23 | 20         | 2.71              | 2.9             | 2.9   |       |
|            | 21                | <1.23           | <1.23 | <1.23 | 20         | 2.52              | 3.08            | 3.08  |       |
|            | 21                | <1.23           | <1.23 | <1.23 | 21.5       | 2.3               | 3.43            | <1.23 |       |
|            | 21                | <1.23           | <1.23 | <1.23 | 21.5       | <1.23             | 5.52            | <1.23 |       |
|            | 32                | 2.68            | 3.5   | 3.58  | 32.2       | 3.03              | 2.81            | <1.23 |       |
|            | 32                | <1.23           | 2.43  | 4.74  | 32.25      | 2.22              | 3.48            | <1.23 |       |
|            | 32                | <1.23           | 2.58  | 2.48  | 40.5       | <1.23             | 2.12            | <1.23 |       |
|            | 30                | <1.23           | 2.75  | 2.95  | 40.5       | 2.56              | 2.62            | <1.23 |       |
|            | 36                | <1.23           | 2.68  | 3.65  | 45         | <1.23             | 2.67            | 2.22  |       |
|            | 39                | 2.99            | 2.94  | 3.83  | 45         | 1.83              | 3.74            | 2     |       |
|            | 39                | 3.35            | 2.56  | 2     | 45         | 1.83              | 2.12            | <1.23 |       |
|            | 35                | <1.23           | 2.88  | 3.8   | 54.25      | <1.23             | 3.79            | 1.7   |       |
|            | 40                | 3.3             | 2     | 5.21  | 47.5       | <1.23             | 2.48            | <1.23 |       |
|            | 40                | 3.58            | 2.52  | 5.15  | 54         | 1.52              | 2.95            | <1.23 |       |
|            | 38                | 2.18            | 2.86  | 3.6   | 40.5       | 2.22              | 3.8             | <1.23 |       |
|            | 37                | <1.23           | 3.86  | 3.73  | 56         | <1.23             | <1.23           | <1.23 |       |
|            | 36                | <1.23           | 2.99  | 3.56  | 43         | <1.23             | 4               | 2.48  |       |
|            | 36                | <1.23           | 2.89  | 3.37  | 62.5       | <1.23             | 3.43            | 2.88  |       |
|            | 35                | <1.23           | 2.91  | 2.37  | 61.75      | <1.23             | 1.7             | <1.23 |       |
| 39         | <1.23             | 3.04            | 3.99  | 71    | <1.23      | 2.34              | 2.12            |       |       |
| 41         | <1.23             | 3.04            | 4.16  | 87    | 1.7        | 5.23              | 2.81            |       |       |
| 35         | <1.23             | 2.45            | 2.82  | 667   | <1.23      | <1.23             | <1.23           |       |       |
| 36         | <1.23             | 2.12            | 2.9   | 667   | <1.23      | <1.23             | <1.23           |       |       |
| 39         | 1.7               | 3.7             | 4.05  | 667   | <1.23      | <1.23             | <1.23           |       |       |

Table S3 – Statistical analysis of differences in microbiome composition in mouse cecum content

| 1 <sup>st</sup> comparator | 2 <sup>nd</sup> comparator | Bacilli | Clostridia | Betaproteo-<br>bacteria | Gammaproteo-<br>bacteria |
|----------------------------|----------------------------|---------|------------|-------------------------|--------------------------|
| N                          | A/B1                       |         | ***        |                         |                          |
|                            | A/B2                       |         | ****       | ****                    |                          |
|                            | A/B5                       |         | ****       | ****                    |                          |
|                            | A/B28                      |         |            |                         |                          |
|                            | Va1                        | **      | ****       | ****                    | ****                     |
|                            | Va2                        |         | ****       | ****                    |                          |
|                            | Va5                        |         | ****       | ****                    |                          |
|                            | Va9                        |         | ****       | ****                    | **                       |
|                            | Va28                       |         |            |                         |                          |
|                            | Ve1                        |         |            | ****                    | ****                     |
|                            | Ve2                        | **      | **         | ****                    | ****                     |
|                            | Ve3-4                      | **      | **         | ****                    | *                        |
|                            | Ve28                       |         |            |                         |                          |
| A/B1                       | Va1                        |         | ****       |                         |                          |
|                            | Ve1                        |         | ****       |                         |                          |
|                            | A/B28                      |         | ****       |                         |                          |
| A/B2                       | Va2                        |         |            | ****                    |                          |
|                            | Ve2                        |         |            |                         |                          |
|                            | A/B28                      |         | ****       | ****                    |                          |
| A/B5                       | Va5                        |         | ****       | ****                    |                          |
|                            | A/B28                      |         | ****       | ****                    |                          |
| A/B28                      | Va28                       |         |            |                         |                          |
|                            | Ve28                       |         |            |                         |                          |
| Va1                        | Ve1                        |         |            |                         |                          |
|                            | Va28                       |         | ****       | **                      | **                       |
| Va2                        | Ve2                        |         | **         | ****                    |                          |
|                            | Va28                       |         | ****       | ****                    |                          |
| Va5                        | Va28                       |         | ****       | ****                    |                          |
| Va9                        | Va28                       |         | ****       | ***                     |                          |
| Va28                       | Ve28                       |         |            |                         |                          |
| Ve1                        | Ve28                       |         | ****       |                         | ****                     |
| Ve2                        | Ve28                       |         | ****       | ***                     |                          |
| Ve3-4                      | Ve28                       | *       | ****       |                         |                          |

A/B = actoxumab/bezlotoxumab

Va = vancomycin

Ve = vehicle

Numbers indicate Day post-challenge

\*= $p<0.05$ ; \*\*= $p<0.01$ ; \*\*\*= $p<0.001$ ; \*\*\*\*= $p<0.0001$

Table S4 – Statistical analysis of differences in microbiome composition in mouse feces

| 1 <sup>st</sup> comparator | 2 <sup>nd</sup> comparator | Bacilli | Clostridia | Betaproteo-<br>bacteria | Gammaproteo-<br>bacteria |
|----------------------------|----------------------------|---------|------------|-------------------------|--------------------------|
| N                          | A/B1                       | ***     | ****       | ***                     | ****                     |
|                            | A/B2                       |         | ****       | ****                    |                          |
|                            | A/B5                       |         | **         |                         |                          |
|                            | A/B10                      |         |            |                         |                          |
|                            | A/B15                      |         |            |                         |                          |
|                            | A/B21                      |         |            |                         |                          |
|                            | A/B28                      |         |            |                         |                          |
|                            | Va1                        | ****    | ****       |                         | ****                     |
|                            | Va2                        | ****    | ****       | ***                     | *                        |
|                            | Va5                        |         | ****       | ****                    | **                       |
|                            | Va10                       |         | ****       | ****                    |                          |
|                            | Va15                       |         |            |                         |                          |
|                            | Va21                       |         | ****       |                         |                          |
|                            | Va28                       |         |            |                         |                          |
|                            | Ve1                        | ****    | ****       |                         |                          |
|                            | Ve2                        | ****    | ****       |                         |                          |
|                            | Ve5                        |         | ****       |                         |                          |
|                            | Ve10                       |         |            |                         |                          |
|                            | Ve15                       |         |            |                         |                          |
|                            | Ve21                       |         |            |                         |                          |
| Ve28                       |                            |         |            |                         |                          |
| A/B1                       | A/B28                      | ****    | ****       | *                       | ****                     |
|                            | Va1                        |         |            | ****                    | ***                      |
|                            | Ve1                        | ****    |            |                         | *                        |
| A/B2                       | A/B28                      |         | ****       | **                      |                          |
|                            | Va2                        | ****    | *          |                         |                          |
|                            | Ve2                        | ****    |            |                         |                          |
| A/B5                       | A/B28                      |         |            |                         |                          |
|                            | Va5                        |         | ****       | ****                    |                          |
|                            | Ve5                        |         |            |                         |                          |
| A/B10                      | A/B28                      |         |            |                         |                          |
|                            | Va10                       |         | ****       | ****                    |                          |
|                            | Ve10                       |         |            |                         |                          |
| A/B15                      | A/B28                      |         |            |                         |                          |
|                            | Va15                       |         |            |                         |                          |
|                            | Ve15                       |         |            |                         |                          |
| A/B21                      | A/B28                      |         |            |                         |                          |
|                            | Va21                       |         | ****       |                         |                          |
|                            | Ve21                       |         |            |                         |                          |
| A/B28                      | Va28                       |         |            |                         |                          |
|                            | Ve28                       |         |            |                         |                          |

Table S4 (cont'd) – Statistical analysis of differences in microbiome composition in mouse feces

| 1 <sup>st</sup> comparator | 2 <sup>nd</sup> comparator | Bacilli | Clostridia | Betaproteo-<br>bacteria | Gammaproteo-<br>bacteria |
|----------------------------|----------------------------|---------|------------|-------------------------|--------------------------|
| Va1                        | Ve1                        | *       |            |                         | ****                     |
|                            | Va28                       | **      | ****       |                         | ****                     |
| Va2                        | Ve2                        |         |            |                         |                          |
|                            | Va28                       | ***     | ****       |                         |                          |
| Va5                        | Ve5                        |         | ****       |                         |                          |
|                            | Va28                       |         | ****       | ***                     |                          |
| Va10                       | Ve10                       |         | ****       | *                       |                          |
|                            | Va28                       |         | ****       |                         |                          |
| Va15                       | Ve15                       |         |            |                         |                          |
|                            | Va28                       |         |            |                         |                          |
| Va21                       | Ve21                       |         |            |                         |                          |
|                            | Va28                       |         |            |                         |                          |
| Va28                       | Ve28                       |         |            |                         |                          |
| Ve1                        | Ve28                       | ****    | ****       |                         |                          |
| Ve2                        | Ve28                       | ****    | ****       |                         |                          |
| Ve5                        | Ve28                       |         |            |                         |                          |
| Ve10                       | Ve28                       |         |            |                         |                          |
| Ve15                       | Ve28                       |         |            |                         |                          |
| Ve21                       | Ve28                       |         |            |                         |                          |
| Ve28                       | Ve28                       |         |            |                         |                          |

A/B = actoxumab/bezlotoxumab

Va = vancomycin

Ve = vehicle

Numbers indicate Day post-challenge

\*= $p < 0.05$ ; \*\*= $p < 0.01$ ; \*\*\*= $p < 0.001$ ; \*\*\*\*= $p < 0.0001$
